# Supplementary material
Source: HighWire-hosted journal article supplement (http://cmajopen.ca/highwire/filestream/80765/field_highwire_adjunct_files/3/open-2012-0015-4-at.pdf)
Supplement: open-2012-0015-4-at.pdf [file open-2012-0015-4-at.pdf]

#### Appendix 4: Definition of categories and exposure levels for variables used in the Population Health Model for cardiovascular disease

| Variables                                 | Category                 | Definition                                                                  |
|-------------------------------------------|--------------------------|-----------------------------------------------------------------------------|
| <b>Total and HDL cholesterol (mmol/L)</b> | Low                      | <b>Total</b> <4.15 or <b>HDL</b> <0.90                                      |
|                                           | Low-medium               | 4.15-5.17 or 0.90-1.16                                                      |
|                                           | Medium                   | 5.18-6.21 or 1.17-1.29                                                      |
|                                           | Medium-high              | 6.22-7.24 or 1.30-1.54                                                      |
|                                           | High                     | >7.25 or >1.55                                                              |
| <b>Blood pressure (mm Hg)</b>             | Optimal                  | <b>Systolic</b> <120 and <b>Diastolic</b> <80                               |
|                                           | Normal                   | 120-130 or 80-85                                                            |
|                                           | High-normal              | 130-140 or 86-90                                                            |
|                                           | Hypertensive stage I     | 140-160 or 90-100                                                           |
|                                           | Hypertensive stage II-IV | >160 or >100                                                                |
| <b>BMI (kg/m<sup>2</sup>)</b>             | Underweight              | <18.5                                                                       |
|                                           | Normal                   | 18.5-25                                                                     |
|                                           | Overweight               | 25.1-30                                                                     |
|                                           | Obese                    | >30                                                                         |
| <b>Diabetes</b>                           | Yes                      | Physician diagnosed diabetes                                                |
|                                           | No                       |                                                                             |
| <b>Smoking status</b>                     | Light smoker             | Less than 20 cigarettes a day                                               |
|                                           | Heavy smoker             | At least 20 cigarettes a day                                                |
|                                           | Non-smoker               | Never/former smoker                                                         |
| <b>Age</b>                                | Multiple age groups      | Defined as needed                                                           |
| <b>Sex</b>                                | Male                     |                                                                             |
|                                           | Female                   |                                                                             |
| <b>Region</b>                             | Atlantic                 | New Brunswick, Nova Scotia, Prince Edward Island, Newfoundland and Labrador |
|                                           | Quebec                   | Quebec                                                                      |
|                                           | Ontario                  | Ontario                                                                     |
|                                           | Prairies                 | Manitoba, Saskatchewan, Alberta                                             |
|                                           | British Columbia         | British Columbia                                                            |
| <b>Ethnicity</b>                          | White                    | Self-reported ethnicity                                                     |
|                                           | Non-white                |                                                                             |
| <b>Immigration</b>                        | Non-immigrant            | Self-reported immigrant status                                              |
|                                           | Immigrant                |                                                                             |
| <b>Income</b>                             | Low                      | Self-reported income                                                        |
|                                           | Medium-low               |                                                                             |
|                                           | Medium                   |                                                                             |
|                                           | High                     |                                                                             |
| <b>Education</b>                          | Low                      | Self-reported education                                                     |
|                                           | Medium-low               |                                                                             |
|                                           | Medium                   |                                                                             |
|                                           | High                     |                                                                             |
| <b>Heart disease</b>                      | Yes                      | Self-reported heart disease                                                 |
|                                           | No                       |                                                                             |

Notes: BMI= body mass index, CVD= cardiovascular disease, HDL= high-density lipoprotein.
